# Supplementary material
Source: HighWire-hosted journal article supplement (https://bmjopen.bmj.com/content/10/4/e033000)
Supplement: inline-supplementary-material-1 [file inline-supplementary-material-1.pdf]

**Title:** Association between work schedules and motivation for lifestyle change in workers with overweight or obesity: a cross-sectional study in Japan

**Corresponding author.** Yosuke Yamamoto, MD, PhD

Department of Healthcare Epidemiology, School of Public Health in the Graduate School of Medicine, Kyoto University

Postal address: Yoshidakonoe-cho, Sakyo-ku, Kyoto, 606-8501 (Zip code), Japan

E-mail: yamamoto.yosuke.5n@kyoto-u.ac.jp

Tel: +81757534646, Fax: +81757534644

**Author names and affiliations.** Yukihiro Tanikawa<sup>1</sup>, Miho Kimachi<sup>1</sup>, Minoru Ishikawa<sup>2</sup>, Tomoichiro Hisada<sup>2</sup>, Shunichi Fukuhara<sup>1</sup>, Yosuke Yamamoto<sup>1</sup>

<sup>1</sup> Department of Healthcare Epidemiology, School of Public Health in the Graduate School of Medicine, Kyoto University, Kyoto, Japan

Yoshidakonoe-cho, Sakyo-ku, Kyoto, 606-8501, Japan

<sup>2</sup> Health Examination Centre Urasoe General Hospital, Urasoe, Japan  
3-42-15 Iso, Urasoe, 901-2132, Japan

**Word count:** 2834; **Tables:** 3; **Figures:** 2, **Supplementary Tables:** 2

Supplementary table 1. Baseline characteristics between complete data group and covariates

missing group

|                                    | Total                 | Complete data         | Covariates missing    | Number of missing data |
|------------------------------------|-----------------------|-----------------------|-----------------------|------------------------|
| Participants                       | n= 9243               | n= 8808               | n= 435                |                        |
| Male, n (%)                        | 6765 (73.2)           | 6489 (73.7)           | 276 (63.5)            | 0                      |
| Night/shift workers, n (%)         | 1390 (15)             | 1282 (14.6)           | 108 (24.8)            | 0                      |
| Median age (IQR) years             | 46 (40 - 53)          | 46 (40 - 53)          | 40 (31 - 51)          | 0                      |
| Median BMI (IQR) kg/m <sup>2</sup> | 27.3<br>(26.0 - 29.6) | 27.3<br>(26.0 - 29.6) | 27.2<br>(26.0 - 29.5) | 0                      |
| Comorbidities, n (%)               |                       |                       |                       |                        |
| Diabetes*                          | 1023 (11.5)           | 1013 (11.5)           | 10 (10.6)             | 341                    |
| CAD                                | 141 (1.5)             | 136 (1.5)             | 5 (1.1)               | 0                      |
| CVD                                | 117 (1.3)             | 112 (1.3)             | 5 (1.1)               | 0                      |
| Cancer                             | 202 (2.2)             | 192 (2.2)             | 10 (2.3)              | 0                      |
| Hours of work, n (%)               |                       |                       |                       |                        |
| ≥10 hours/day                      | 2753 (29.9)           | 2654 (30.1)           | 99 (24.0)             | 23                     |
| Hours of sleep, n (%)              |                       |                       |                       |                        |
| <7 hours/day                       | 7777 (84.7)           | 7473 (84.8)           | 304 (81.9)            | 64                     |
| Alcohol habits, n (%)              |                       |                       |                       |                        |
| ≥3 times/week                      | 4680 (50.7)           | 4529 (51.4)           | 151 (35.7)            | 12                     |
| Smoking status, n (%)              |                       |                       |                       |                        |
| Current smoker                     | 2498 (27.0)           | 2400 (27.3)           | 98 (22.7)             | 4                      |

IQR, interquartile range; BMI, body mass index; CAD, coronary artery disease; CVD, cerebrovascular disorder

\*Diabetes was defined as fasting plasma glucose (FPG)  $\geq 7.0$  mmol/L (126 mg/dL), postprandial plasma glucose (PPG)  $\geq 11.2$  mmol/L (200 mg/dL), HbA1c  $\geq 6.5\%$ , self-reported diabetes previously diagnosed by physicians, or the use of antidiabetic agents.

Supplementary table 2. The association between work schedules and SOC for lifestyle based on TTM, categorised into 3 groups —Odds ratios for primary outcome: demonstration of action or maintenance stages—

| Work schedules<br>Odds ratio (95% CI) | Crude<br>n = 9243   | Adjusted*<br>n = 8808 |
|---------------------------------------|---------------------|-----------------------|
| Night work (n= 425)                   | 0.82 (0.66 to 1.04) | 0.84 (0.66 to 1.07)   |
| Shift work (n= 965)                   | 0.76 (0.64 to 0.89) | 0.85 (0.72 to 1.01)   |
| Daytime work (n= 7853)                | 1.00 (Ref)          | 1.00 (Ref)            |

BMI, body mass index; CI, confidence interval; CAD, coronary artery disease; CVD, cerebrovascular disorder; TTM, the transtheoretical model

\* Adjusted for age (<40 years vs. ≥40 years), sex, comorbidities (diabetes, CAD, CVD, cancer), BMI (25-29.9 kg/m<sup>2</sup> vs. ≥30 kg/m<sup>2</sup>), current smoking status (yes vs. no), alcohol habits (<3 times/week vs. ≥3 times/week), hours of sleep (<7 hours vs. ≥7 hours), hours of work (<10 hours vs. ≥10 hours).
